# Supplementary material for: Does Cannabidiol (CBD) in Food Supplements Pose a Serious Health Risk? Consequences of the EFSA Clock Stop Regarding Novel Food Authorisation
Source: Preprints.org preprint supplement (doi:10.20944/preprints202208.0232.v1), 2022-08-12

# BMDS 3.0 Analysis Report

GWTX1413

For

GWTX1413 - 39 Week Oral Administration in Beagle Dogs

28.07.2022 09:58:47

## Analysis Info

Analysis Name: GWTX1413

Analysis Description: C:\bmds3201\BMDS3201

Model Type: Dichotomous

Selected Models:

- Frequentist Log-Probit (restricted)

Option Sets:

- Option Set #1
  - Risk Type: Extra Risk
  - BMR: 0.1
  - Confidence Level: 0.95
  - Background: Estimated

## Data

| GWTX1413 - 39 Week Oral Administration in Beagle Dogs |                             |                                   |
|-------------------------------------------------------|-----------------------------|-----------------------------------|
| Source: FDA (2018)                                    |                             |                                   |
| CBD Dose                                              | N                           | Incidence                         |
| mg/kg<br>bw/day                                       | males + females<br>combined | Liver (hepatocyte<br>hypertrophy) |
| 0                                                     | 8                           | 1                                 |
| 10                                                    | 8                           | 5                                 |
| 50                                                    | 8                           | 7                                 |
| 100                                                   | 8                           | 8                                 |

## Frequentist Log-Probit Restricted Option Set #1

| User Input   |                                                       |                  |            |                         |                                |
|--------------|-------------------------------------------------------|------------------|------------|-------------------------|--------------------------------|
| Info         |                                                       | Model Options    |            | Model Data              |                                |
| Model        | frequentist Log-Probit v1.1                           | Risk Type        | Extra Risk | Dependent Variable      | mg/kg bw/day                   |
| Dataset Name | GWTX1413 - 39 Week Oral Administration in Beagle Dogs | BMR              | 0.1        | Independent Variable    | Liver (hepatocyte hypertrophy) |
| User notes   | Source: FDA (2018)                                    | Confidence Level | 0.95       | Total # of Observations | 4                              |
|              |                                                       | Background       | Estimated  |                         |                                |

| Model Results                                                                                                                                                                                                                                                                                                                                                                        |             |                  |  |                 |             |          |             |      |             |     |             |         |             |        |   |                  |           |
|--------------------------------------------------------------------------------------------------------------------------------------------------------------------------------------------------------------------------------------------------------------------------------------------------------------------------------------------------------------------------------------|-------------|------------------|--|-----------------|-------------|----------|-------------|------|-------------|-----|-------------|---------|-------------|--------|---|------------------|-----------|
| <table> <tr> <th colspan="2">Benchmark Dose</th></tr> <tr> <td>BMD</td><td>3.014237495</td></tr> <tr> <td>BMDL</td><td>1.517906631</td></tr> <tr> <td>BMDU</td><td>9.827687863</td></tr> <tr> <td>AIC</td><td>27.64123367</td></tr> <tr> <td>P-value</td><td>0.577102751</td></tr> <tr> <td>D.O.F.</td><td>2</td></tr> <tr> <td>Chi<sup>2</sup></td><td>1.0994699</td></tr> </table> |             | Benchmark Dose   |  | BMD             | 3.014237495 | BMDL     | 1.517906631 | BMDU | 9.827687863 | AIC | 27.64123367 | P-value | 0.577102751 | D.O.F. | 2 | Chi <sup>2</sup> | 1.0994699 |
| Benchmark Dose                                                                                                                                                                                                                                                                                                                                                                       |             |                  |  |                 |             |          |             |      |             |     |             |         |             |        |   |                  |           |
| BMD                                                                                                                                                                                                                                                                                                                                                                                  | 3.014237495 |                  |  |                 |             |          |             |      |             |     |             |         |             |        |   |                  |           |
| BMDL                                                                                                                                                                                                                                                                                                                                                                                 | 1.517906631 |                  |  |                 |             |          |             |      |             |     |             |         |             |        |   |                  |           |
| BMDU                                                                                                                                                                                                                                                                                                                                                                                 | 9.827687863 |                  |  |                 |             |          |             |      |             |     |             |         |             |        |   |                  |           |
| AIC                                                                                                                                                                                                                                                                                                                                                                                  | 27.64123367 |                  |  |                 |             |          |             |      |             |     |             |         |             |        |   |                  |           |
| P-value                                                                                                                                                                                                                                                                                                                                                                              | 0.577102751 |                  |  |                 |             |          |             |      |             |     |             |         |             |        |   |                  |           |
| D.O.F.                                                                                                                                                                                                                                                                                                                                                                               | 2           |                  |  |                 |             |          |             |      |             |     |             |         |             |        |   |                  |           |
| Chi <sup>2</sup>                                                                                                                                                                                                                                                                                                                                                                     | 1.0994699   |                  |  |                 |             |          |             |      |             |     |             |         |             |        |   |                  |           |
| <table> <tr> <th colspan="2">Model Parameters</th></tr> <tr> <td># of Parameters</td><td>3</td></tr> <tr> <th>Variable</th><th>Estimate</th></tr> <tr> <td>g</td><td>0.137835074</td></tr> <tr> <td>a</td><td>-2.38489846</td></tr> <tr> <td>b</td><td>Bounded</td></tr> </table>                                                                                                    |             | Model Parameters |  | # of Parameters | 3           | Variable | Estimate    | g    | 0.137835074 | a   | -2.38489846 | b       | Bounded     |        |   |                  |           |
| Model Parameters                                                                                                                                                                                                                                                                                                                                                                     |             |                  |  |                 |             |          |             |      |             |     |             |         |             |        |   |                  |           |
| # of Parameters                                                                                                                                                                                                                                                                                                                                                                      | 3           |                  |  |                 |             |          |             |      |             |     |             |         |             |        |   |                  |           |
| Variable                                                                                                                                                                                                                                                                                                                                                                             | Estimate    |                  |  |                 |             |          |             |      |             |     |             |         |             |        |   |                  |           |
| g                                                                                                                                                                                                                                                                                                                                                                                    | 0.137835074 |                  |  |                 |             |          |             |      |             |     |             |         |             |        |   |                  |           |
| a                                                                                                                                                                                                                                                                                                                                                                                    | -2.38489846 |                  |  |                 |             |          |             |      |             |     |             |         |             |        |   |                  |           |
| b                                                                                                                                                                                                                                                                                                                                                                                    | Bounded     |                  |  |                 |             |          |             |      |             |     |             |         |             |        |   |                  |           |

| Goodness of Fit |                       |             |          |      |                 |
|-----------------|-----------------------|-------------|----------|------|-----------------|
| Dose            | Estimated Probability | Expected    | Observed | Size | Scaled Residual |
| 0               | 0.137835074           | 1.102680589 | 1        | 8    | -0.10531        |
| 10              | 0.54063746            | 4.325099683 | 5        | 8    | 0.4788106       |
| 50              | 0.9453689             | 7.562951202 | 7        | 8    | -0.8758         |
| 100             | 0.988619282           | 7.908954253 | 8        | 8    | 0.3034697       |

| Analysis of Deviance |                |                 |            |           |          |
|----------------------|----------------|-----------------|------------|-----------|----------|
| Model                | Log Likelihood | # of Parameters | Deviance   | Test d.f. | P Value  |
| Full Model           | -11.32082849   | 4               | -          | -         | NA       |
| Fitted Model         | -11.82061683   | 2               | 0.9995767  | 2         | 0.606659 |
| Reduced Model        | -20.5917297    | 1               | 18.5418024 | 3         | 0.00034  |

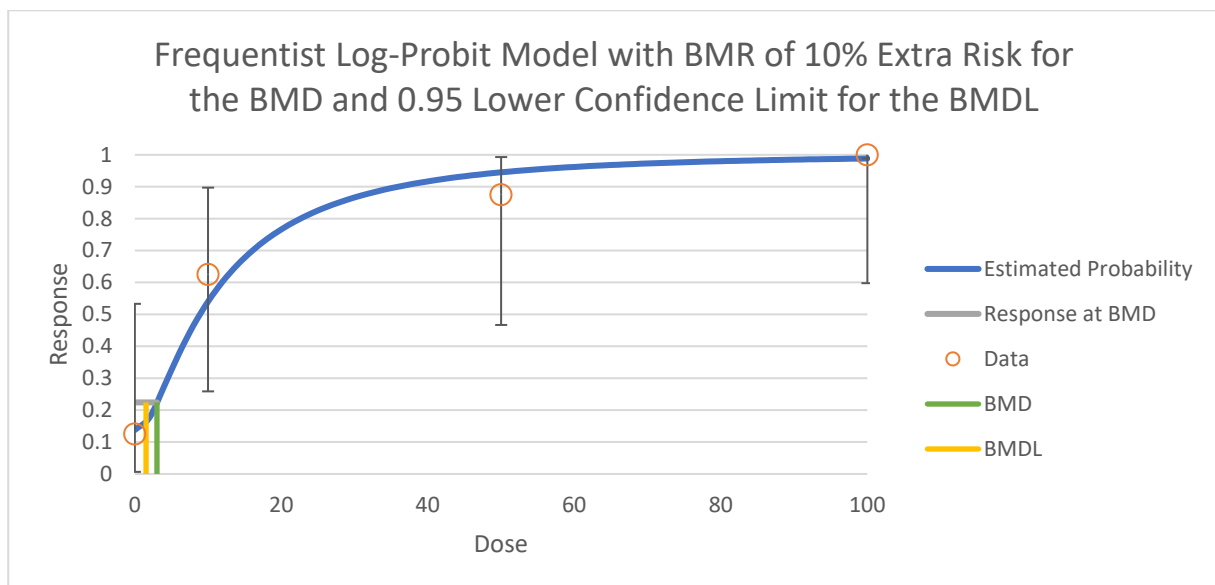

## Summary of Results

| Option set #1 (Hover for details) |               |             |            |          |          |           |           |             |                                        |                      |                                                                                                                                     |
|-----------------------------------|---------------|-------------|------------|----------|----------|-----------|-----------|-------------|----------------------------------------|----------------------|-------------------------------------------------------------------------------------------------------------------------------------|
| Model                             | Analysis Type | Restriction | RiskType   | BMD      | BMDL     | BMDU      | P Value   | AIC         | Unnormalized Log Posterior Probability | BMDS Recommendation  | BMDS Recommendation Notes                                                                                                           |
| <a href="#">Log-Probit*</a>       | frequentist   | Restricted  | Extra Risk | 3.014237 | 1.517907 | 9.8276879 | 0.5771028 | 27.64123367 | -                                      | Viable - Recommended | <p><b>Lowest AIC</b></p> <p><b>BMD 3x lower than lowest non-zero dose</b></p> <p><b>BMDL 3x lower than lowest non-zero dose</b></p> |

\*Selected model in bold; scaled residuals for selected model for doses 0, 10, 50, 100 were -0.105309684630889, 0.478810629656141, -0.875800382261093, 0.303469671400525 [units], respectively.

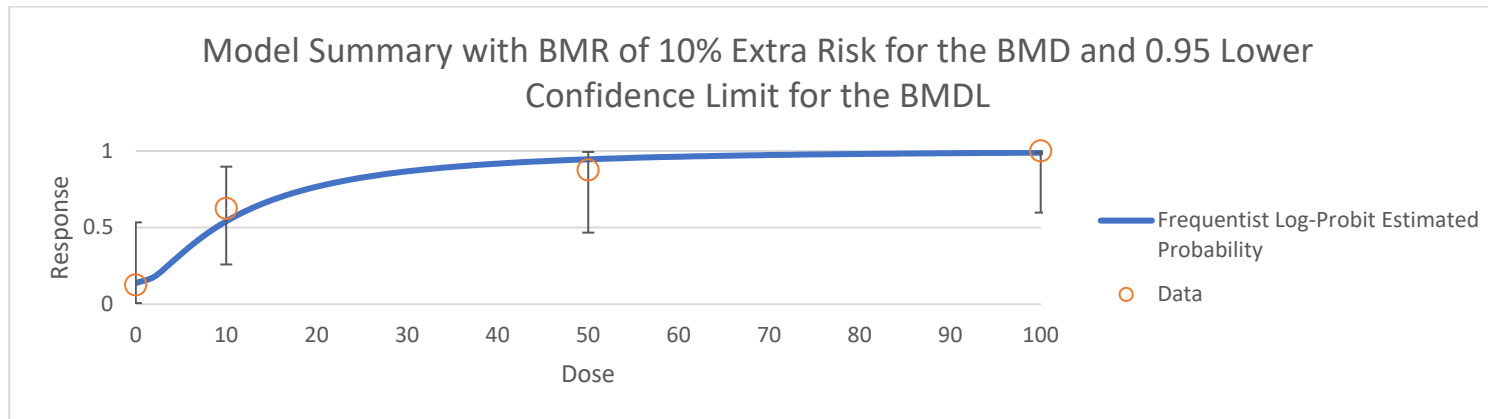

Supplement: Supplementary file 3 [file supplementary]
