# Supplementary material for: Does Cannabidiol (CBD) in Food Supplements Pose a Serious Health Risk? Consequences of the EFSA Clock Stop Regarding Novel Food Authorisation
Source: Preprints.org preprint supplement (doi:10.20944/preprints202208.0232.v1), 2022-08-12

# BMDS 3.0 Analysis Report

Marx et al. 2018

For

Liver weight – female – 90-day oral study in rats

18.07.2022 14:23:48

## Analysis Info

Analysis Name: Marx et al. 2018 – female

Analysis Description: C:\bmds3201\BMDS3201

Model Type: Continuous

Selected Models:

- Frequentist Log-Logistic (restricted)

Option Sets:

- Option Set #1
  - BMR Type: Std. Dev.
  - BMRF: 1
  - Confidence Level: 0.95
  - Distribution: Normal
  - Variance: Constant
  - Polynomial Restriction: Use dataset adverse direction

## Data

| Marx et al. - Liver weight - female         |        |      |           |
|---------------------------------------------|--------|------|-----------|
| Source: Marx et al. 2018, Table 12, page 21 |        |      |           |
| CBD Dose                                    | N      | Mean | Std. Dev. |
| mg/kg bw/day                                | female | g    | g         |
| 0                                           | 10     | 6.42 | 0.4       |
| 25                                          | 10     | 6.7  | 0.56      |
| 90                                          | 10     | 7.4  | 0.6       |
| 180                                         | 10     | 9.21 | 0.54      |

\* Note: Dose levels adjusted from hemp extract to CBD assuming 26% of hemp extract are phytocannabinoids, from which 96% are CBD.

Adverse Direction: Automatic

## Frequentist Polynomial Restricted Option Set #1

| User Input                                                                                                                                                                                                                                                                                                                                                                                                                                                                                                                                                             |                                                                        |  |       |                                            |              |                                     |            |                       |                     |                                                                        |                                                                                                                                                                                                                                                                                                                                                                                                                                                               |               |  |          |           |      |   |                  |   |                  |      |                   |        |                                                                                                                                                                                                                                                                                                                                                                                                                                                |            |  |                    |              |                      |   |                         |   |                   |           |
|------------------------------------------------------------------------------------------------------------------------------------------------------------------------------------------------------------------------------------------------------------------------------------------------------------------------------------------------------------------------------------------------------------------------------------------------------------------------------------------------------------------------------------------------------------------------|------------------------------------------------------------------------|--|-------|--------------------------------------------|--------------|-------------------------------------|------------|-----------------------|---------------------|------------------------------------------------------------------------|---------------------------------------------------------------------------------------------------------------------------------------------------------------------------------------------------------------------------------------------------------------------------------------------------------------------------------------------------------------------------------------------------------------------------------------------------------------|---------------|--|----------|-----------|------|---|------------------|---|------------------|------|-------------------|--------|------------------------------------------------------------------------------------------------------------------------------------------------------------------------------------------------------------------------------------------------------------------------------------------------------------------------------------------------------------------------------------------------------------------------------------------------|------------|--|--------------------|--------------|----------------------|---|-------------------------|---|-------------------|-----------|
| <table border="1" style="width: 100%; border-collapse: collapse;"> <thead> <tr style="background-color: #a6c9ec;"> <th style="width: 15%;">Info</th> <th></th> </tr> </thead> <tbody> <tr> <td>Model</td> <td>frequentist<br/>Polynomial degree<br/>3 v1.1</td> </tr> <tr> <td>Dataset Name</td> <td>Marx et al. - Liver weight - female</td> </tr> <tr> <td>User notes</td> <td>[Add user notes here]</td> </tr> <tr> <td>Dose-Response Model</td> <td><math>M[\text{dose}] = g + b_1 * \text{dose} + b_2 * \text{dose}^2 + \dots</math></td> </tr> </tbody> </table> | Info                                                                   |  | Model | frequentist<br>Polynomial degree<br>3 v1.1 | Dataset Name | Marx et al. - Liver weight - female | User notes | [Add user notes here] | Dose-Response Model | $M[\text{dose}] = g + b_1 * \text{dose} + b_2 * \text{dose}^2 + \dots$ | <table border="1" style="width: 100%; border-collapse: collapse;"> <thead> <tr style="background-color: #a6c9ec;"> <th style="width: 15%;">Model Options</th> <th></th> </tr> </thead> <tbody> <tr> <td>BMR Type</td> <td>Std. Dev.</td> </tr> <tr> <td>BMRF</td> <td>1</td> </tr> <tr> <td>Tail Probability</td> <td>-</td> </tr> <tr> <td>Confidence Level</td> <td>0.95</td> </tr> <tr> <td>Distribution Type</td> <td>Normal</td> </tr> </tbody> </table> | Model Options |  | BMR Type | Std. Dev. | BMRF | 1 | Tail Probability | - | Confidence Level | 0.95 | Distribution Type | Normal | <table border="1" style="width: 100%; border-collapse: collapse;"> <thead> <tr style="background-color: #a6c9ec;"> <th style="width: 15%;">Model Data</th> <th></th> </tr> </thead> <tbody> <tr> <td>Dependent Variable</td> <td>mg/kg bw/day</td> </tr> <tr> <td>Independent Variable</td> <td>g</td> </tr> <tr> <td>Total # of Observations</td> <td>4</td> </tr> <tr> <td>Adverse Direction</td> <td>Automatic</td> </tr> </tbody> </table> | Model Data |  | Dependent Variable | mg/kg bw/day | Independent Variable | g | Total # of Observations | 4 | Adverse Direction | Automatic |
| Info                                                                                                                                                                                                                                                                                                                                                                                                                                                                                                                                                                   |                                                                        |  |       |                                            |              |                                     |            |                       |                     |                                                                        |                                                                                                                                                                                                                                                                                                                                                                                                                                                               |               |  |          |           |      |   |                  |   |                  |      |                   |        |                                                                                                                                                                                                                                                                                                                                                                                                                                                |            |  |                    |              |                      |   |                         |   |                   |           |
| Model                                                                                                                                                                                                                                                                                                                                                                                                                                                                                                                                                                  | frequentist<br>Polynomial degree<br>3 v1.1                             |  |       |                                            |              |                                     |            |                       |                     |                                                                        |                                                                                                                                                                                                                                                                                                                                                                                                                                                               |               |  |          |           |      |   |                  |   |                  |      |                   |        |                                                                                                                                                                                                                                                                                                                                                                                                                                                |            |  |                    |              |                      |   |                         |   |                   |           |
| Dataset Name                                                                                                                                                                                                                                                                                                                                                                                                                                                                                                                                                           | Marx et al. - Liver weight - female                                    |  |       |                                            |              |                                     |            |                       |                     |                                                                        |                                                                                                                                                                                                                                                                                                                                                                                                                                                               |               |  |          |           |      |   |                  |   |                  |      |                   |        |                                                                                                                                                                                                                                                                                                                                                                                                                                                |            |  |                    |              |                      |   |                         |   |                   |           |
| User notes                                                                                                                                                                                                                                                                                                                                                                                                                                                                                                                                                             | [Add user notes here]                                                  |  |       |                                            |              |                                     |            |                       |                     |                                                                        |                                                                                                                                                                                                                                                                                                                                                                                                                                                               |               |  |          |           |      |   |                  |   |                  |      |                   |        |                                                                                                                                                                                                                                                                                                                                                                                                                                                |            |  |                    |              |                      |   |                         |   |                   |           |
| Dose-Response Model                                                                                                                                                                                                                                                                                                                                                                                                                                                                                                                                                    | $M[\text{dose}] = g + b_1 * \text{dose} + b_2 * \text{dose}^2 + \dots$ |  |       |                                            |              |                                     |            |                       |                     |                                                                        |                                                                                                                                                                                                                                                                                                                                                                                                                                                               |               |  |          |           |      |   |                  |   |                  |      |                   |        |                                                                                                                                                                                                                                                                                                                                                                                                                                                |            |  |                    |              |                      |   |                         |   |                   |           |
| Model Options                                                                                                                                                                                                                                                                                                                                                                                                                                                                                                                                                          |                                                                        |  |       |                                            |              |                                     |            |                       |                     |                                                                        |                                                                                                                                                                                                                                                                                                                                                                                                                                                               |               |  |          |           |      |   |                  |   |                  |      |                   |        |                                                                                                                                                                                                                                                                                                                                                                                                                                                |            |  |                    |              |                      |   |                         |   |                   |           |
| BMR Type                                                                                                                                                                                                                                                                                                                                                                                                                                                                                                                                                               | Std. Dev.                                                              |  |       |                                            |              |                                     |            |                       |                     |                                                                        |                                                                                                                                                                                                                                                                                                                                                                                                                                                               |               |  |          |           |      |   |                  |   |                  |      |                   |        |                                                                                                                                                                                                                                                                                                                                                                                                                                                |            |  |                    |              |                      |   |                         |   |                   |           |
| BMRF                                                                                                                                                                                                                                                                                                                                                                                                                                                                                                                                                                   | 1                                                                      |  |       |                                            |              |                                     |            |                       |                     |                                                                        |                                                                                                                                                                                                                                                                                                                                                                                                                                                               |               |  |          |           |      |   |                  |   |                  |      |                   |        |                                                                                                                                                                                                                                                                                                                                                                                                                                                |            |  |                    |              |                      |   |                         |   |                   |           |
| Tail Probability                                                                                                                                                                                                                                                                                                                                                                                                                                                                                                                                                       | -                                                                      |  |       |                                            |              |                                     |            |                       |                     |                                                                        |                                                                                                                                                                                                                                                                                                                                                                                                                                                               |               |  |          |           |      |   |                  |   |                  |      |                   |        |                                                                                                                                                                                                                                                                                                                                                                                                                                                |            |  |                    |              |                      |   |                         |   |                   |           |
| Confidence Level                                                                                                                                                                                                                                                                                                                                                                                                                                                                                                                                                       | 0.95                                                                   |  |       |                                            |              |                                     |            |                       |                     |                                                                        |                                                                                                                                                                                                                                                                                                                                                                                                                                                               |               |  |          |           |      |   |                  |   |                  |      |                   |        |                                                                                                                                                                                                                                                                                                                                                                                                                                                |            |  |                    |              |                      |   |                         |   |                   |           |
| Distribution Type                                                                                                                                                                                                                                                                                                                                                                                                                                                                                                                                                      | Normal                                                                 |  |       |                                            |              |                                     |            |                       |                     |                                                                        |                                                                                                                                                                                                                                                                                                                                                                                                                                                               |               |  |          |           |      |   |                  |   |                  |      |                   |        |                                                                                                                                                                                                                                                                                                                                                                                                                                                |            |  |                    |              |                      |   |                         |   |                   |           |
| Model Data                                                                                                                                                                                                                                                                                                                                                                                                                                                                                                                                                             |                                                                        |  |       |                                            |              |                                     |            |                       |                     |                                                                        |                                                                                                                                                                                                                                                                                                                                                                                                                                                               |               |  |          |           |      |   |                  |   |                  |      |                   |        |                                                                                                                                                                                                                                                                                                                                                                                                                                                |            |  |                    |              |                      |   |                         |   |                   |           |
| Dependent Variable                                                                                                                                                                                                                                                                                                                                                                                                                                                                                                                                                     | mg/kg bw/day                                                           |  |       |                                            |              |                                     |            |                       |                     |                                                                        |                                                                                                                                                                                                                                                                                                                                                                                                                                                               |               |  |          |           |      |   |                  |   |                  |      |                   |        |                                                                                                                                                                                                                                                                                                                                                                                                                                                |            |  |                    |              |                      |   |                         |   |                   |           |
| Independent Variable                                                                                                                                                                                                                                                                                                                                                                                                                                                                                                                                                   | g                                                                      |  |       |                                            |              |                                     |            |                       |                     |                                                                        |                                                                                                                                                                                                                                                                                                                                                                                                                                                               |               |  |          |           |      |   |                  |   |                  |      |                   |        |                                                                                                                                                                                                                                                                                                                                                                                                                                                |            |  |                    |              |                      |   |                         |   |                   |           |
| Total # of Observations                                                                                                                                                                                                                                                                                                                                                                                                                                                                                                                                                | 4                                                                      |  |       |                                            |              |                                     |            |                       |                     |                                                                        |                                                                                                                                                                                                                                                                                                                                                                                                                                                               |               |  |          |           |      |   |                  |   |                  |      |                   |        |                                                                                                                                                                                                                                                                                                                                                                                                                                                |            |  |                    |              |                      |   |                         |   |                   |           |
| Adverse Direction                                                                                                                                                                                                                                                                                                                                                                                                                                                                                                                                                      | Automatic                                                              |  |       |                                            |              |                                     |            |                       |                     |                                                                        |                                                                                                                                                                                                                                                                                                                                                                                                                                                               |               |  |          |           |      |   |                  |   |                  |      |                   |        |                                                                                                                                                                                                                                                                                                                                                                                                                                                |            |  |                    |              |                      |   |                         |   |                   |           |

| Model Results                                                                                                                                                                                                                                                                                                                                                                                                                                                                                                     |             |                  |  |                 |             |          |             |      |             |       |             |                |             |        |         |
|-------------------------------------------------------------------------------------------------------------------------------------------------------------------------------------------------------------------------------------------------------------------------------------------------------------------------------------------------------------------------------------------------------------------------------------------------------------------------------------------------------------------|-------------|------------------|--|-----------------|-------------|----------|-------------|------|-------------|-------|-------------|----------------|-------------|--------|---------|
| <table border="1" style="width: 100%; border-collapse: collapse;"> <thead> <tr style="background-color: #a6c9ec;"> <th colspan="2">Benchmark Dose</th> </tr> </thead> <tbody> <tr> <td>BMD</td> <td>51.53386116</td> </tr> <tr> <td>BMDL</td> <td>34.11537067</td> </tr> <tr> <td>BMDU</td> <td>84.63169149</td> </tr> <tr> <td>AIC</td> <td>64.61361206</td> </tr> <tr> <td>Test 4 P-value</td> <td>0.977119536</td> </tr> <tr> <td>D.O.F.</td> <td>2</td> </tr> </tbody> </table>                               |             | Benchmark Dose   |  | BMD             | 51.53386116 | BMDL     | 34.11537067 | BMDU | 84.63169149 | AIC   | 64.61361206 | Test 4 P-value | 0.977119536 | D.O.F. | 2       |
| Benchmark Dose                                                                                                                                                                                                                                                                                                                                                                                                                                                                                                    |             |                  |  |                 |             |          |             |      |             |       |             |                |             |        |         |
| BMD                                                                                                                                                                                                                                                                                                                                                                                                                                                                                                               | 51.53386116 |                  |  |                 |             |          |             |      |             |       |             |                |             |        |         |
| BMDL                                                                                                                                                                                                                                                                                                                                                                                                                                                                                                              | 34.11537067 |                  |  |                 |             |          |             |      |             |       |             |                |             |        |         |
| BMDU                                                                                                                                                                                                                                                                                                                                                                                                                                                                                                              | 84.63169149 |                  |  |                 |             |          |             |      |             |       |             |                |             |        |         |
| AIC                                                                                                                                                                                                                                                                                                                                                                                                                                                                                                               | 64.61361206 |                  |  |                 |             |          |             |      |             |       |             |                |             |        |         |
| Test 4 P-value                                                                                                                                                                                                                                                                                                                                                                                                                                                                                                    | 0.977119536 |                  |  |                 |             |          |             |      |             |       |             |                |             |        |         |
| D.O.F.                                                                                                                                                                                                                                                                                                                                                                                                                                                                                                            | 2           |                  |  |                 |             |          |             |      |             |       |             |                |             |        |         |
| <table border="1" style="width: 100%; border-collapse: collapse;"> <thead> <tr style="background-color: #a6c9ec;"> <th colspan="2">Model Parameters</th> </tr> </thead> <tbody> <tr> <td># of Parameters</td> <td>5</td> </tr> <tr style="background-color: #cccccc;"> <td>Variable</td> <td>Estimate</td> </tr> <tr> <td>g</td> <td>6.438430792</td> </tr> <tr> <td>beta1</td> <td>0.00926048</td> </tr> <tr> <td>beta2</td> <td>Bounded</td> </tr> <tr> <td>beta3</td> <td>Bounded</td> </tr> </tbody> </table> |             | Model Parameters |  | # of Parameters | 5           | Variable | Estimate    | g    | 6.438430792 | beta1 | 0.00926048  | beta2          | Bounded     | beta3  | Bounded |
| Model Parameters                                                                                                                                                                                                                                                                                                                                                                                                                                                                                                  |             |                  |  |                 |             |          |             |      |             |       |             |                |             |        |         |
| # of Parameters                                                                                                                                                                                                                                                                                                                                                                                                                                                                                                   | 5           |                  |  |                 |             |          |             |      |             |       |             |                |             |        |         |
| Variable                                                                                                                                                                                                                                                                                                                                                                                                                                                                                                          | Estimate    |                  |  |                 |             |          |             |      |             |       |             |                |             |        |         |
| g                                                                                                                                                                                                                                                                                                                                                                                                                                                                                                                 | 6.438430792 |                  |  |                 |             |          |             |      |             |       |             |                |             |        |         |
| beta1                                                                                                                                                                                                                                                                                                                                                                                                                                                                                                             | 0.00926048  |                  |  |                 |             |          |             |      |             |       |             |                |             |        |         |
| beta2                                                                                                                                                                                                                                                                                                                                                                                                                                                                                                             | Bounded     |                  |  |                 |             |          |             |      |             |       |             |                |             |        |         |
| beta3                                                                                                                                                                                                                                                                                                                                                                                                                                                                                                             | Bounded     |                  |  |                 |             |          |             |      |             |       |             |                |             |        |         |

| Goodness of Fit |      |                  |               |               |              |           |             |                 |
|-----------------|------|------------------|---------------|---------------|--------------|-----------|-------------|-----------------|
| Dose            | Size | Estimated Median | Calc'd Median | Observed Mean | Estimated SD | Calc'd SD | Observed SD | Scaled Residual |
| 0               | 10   | 6.438430792      | 6.42          | 6.42          | 0.50312864   | 0.4       | 0.4         | -0.115841709    |
| 25              | 10   | 6.672899785      | 6.7           | 6.7           | 0.50312864   | 0.56      | 0.56        | 0.170330999     |
| 90              | 10   | 7.409835735      | 7.4           | 7.4           | 0.50312864   | 0.6       | 0.6         | -0.061819829    |
| 180             | 10   | 9.209011272      | 9.21          | 9.21          | 0.50312864   | 0.54      | 0.54        | 0.006214381     |

| Likelihoods of Interest |                 |                 |            |
|-------------------------|-----------------|-----------------|------------|
| Model                   | Log Likelihood* | # of Parameters | AIC        |
| A1                      | -29.28365975    | 5               | 68.5673195 |
| A2                      | -28.41912111    | 8               | 72.8382422 |
| A3                      | -29.28365975    | 5               | 68.5673195 |
| fitted                  | -29.30680603    | 3               | 64.6136121 |
| R                       | -63.96325219    | 2               | 131.926504 |

| Tests of Interest |                          |         |            |
|-------------------|--------------------------|---------|------------|
| Test              | -2*Log(Likelihood Ratio) | Test df | p-value    |
| 1                 | 71.08826215              | 6       | <0.0001    |
| 2                 | 1.729077269              | 3       | 0.63048872 |
| 3                 | 1.729077269              | 3       | 0.63048872 |
| 4                 | 0.046292569              | 2       | 0.97711954 |

Frequentist Polynomial Degree 3 Model with BMR of 1 Std.  
Dev. for the BMD and 0.95 Lower Confidence Limit for the  
BMDL

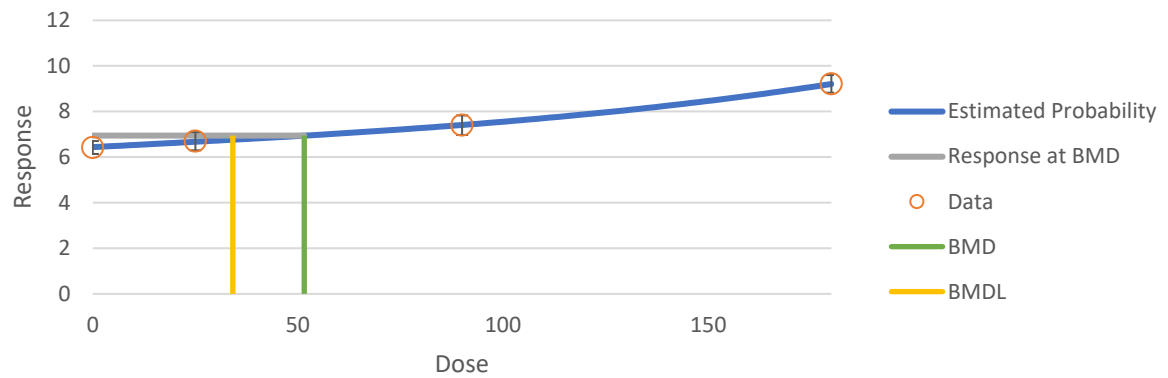

## Frequentist Polynomial Restricted Option Set #1

| User Input                                                                                                                                                                                                                                                                                                                                                                                                                                                                                                                                                                 |                                                                                |  |       |                                         |              |                                     |            |                       |                     |                                                                                |                                                                                                                                                                                                                                                                                                                                                                                                                                                               |               |  |          |           |      |   |                  |   |                  |      |                   |        |                                                                                                                                                                                                                                                                                                                                                                                                                                                |            |  |                    |              |                      |   |                         |   |                   |           |
|----------------------------------------------------------------------------------------------------------------------------------------------------------------------------------------------------------------------------------------------------------------------------------------------------------------------------------------------------------------------------------------------------------------------------------------------------------------------------------------------------------------------------------------------------------------------------|--------------------------------------------------------------------------------|--|-------|-----------------------------------------|--------------|-------------------------------------|------------|-----------------------|---------------------|--------------------------------------------------------------------------------|---------------------------------------------------------------------------------------------------------------------------------------------------------------------------------------------------------------------------------------------------------------------------------------------------------------------------------------------------------------------------------------------------------------------------------------------------------------|---------------|--|----------|-----------|------|---|------------------|---|------------------|------|-------------------|--------|------------------------------------------------------------------------------------------------------------------------------------------------------------------------------------------------------------------------------------------------------------------------------------------------------------------------------------------------------------------------------------------------------------------------------------------------|------------|--|--------------------|--------------|----------------------|---|-------------------------|---|-------------------|-----------|
| <table border="1" style="width: 100%; border-collapse: collapse;"> <thead> <tr style="background-color: #a6c9ec;"> <th style="width: 15%;">Info</th> <th></th> </tr> </thead> <tbody> <tr> <td>Model</td> <td>frequentist<br/>Polynomial degree 2 v1.1</td> </tr> <tr> <td>Dataset Name</td> <td>Marx et al. - Liver weight - female</td> </tr> <tr> <td>User notes</td> <td>[Add user notes here]</td> </tr> <tr> <td>Dose-Response Model</td> <td><math>M[\text{dose}] = g + b_1 \cdot \text{dose} + b_2 \cdot \text{dose}^2 + \dots</math></td> </tr> </tbody> </table> | Info                                                                           |  | Model | frequentist<br>Polynomial degree 2 v1.1 | Dataset Name | Marx et al. - Liver weight - female | User notes | [Add user notes here] | Dose-Response Model | $M[\text{dose}] = g + b_1 \cdot \text{dose} + b_2 \cdot \text{dose}^2 + \dots$ | <table border="1" style="width: 100%; border-collapse: collapse;"> <thead> <tr style="background-color: #a6c9ec;"> <th style="width: 15%;">Model Options</th> <th></th> </tr> </thead> <tbody> <tr> <td>BMR Type</td> <td>Std. Dev.</td> </tr> <tr> <td>BMRF</td> <td>1</td> </tr> <tr> <td>Tail Probability</td> <td>-</td> </tr> <tr> <td>Confidence Level</td> <td>0.95</td> </tr> <tr> <td>Distribution Type</td> <td>Normal</td> </tr> </tbody> </table> | Model Options |  | BMR Type | Std. Dev. | BMRF | 1 | Tail Probability | - | Confidence Level | 0.95 | Distribution Type | Normal | <table border="1" style="width: 100%; border-collapse: collapse;"> <thead> <tr style="background-color: #a6c9ec;"> <th style="width: 15%;">Model Data</th> <th></th> </tr> </thead> <tbody> <tr> <td>Dependent Variable</td> <td>mg/kg bw/day</td> </tr> <tr> <td>Independent Variable</td> <td>g</td> </tr> <tr> <td>Total # of Observations</td> <td>4</td> </tr> <tr> <td>Adverse Direction</td> <td>Automatic</td> </tr> </tbody> </table> | Model Data |  | Dependent Variable | mg/kg bw/day | Independent Variable | g | Total # of Observations | 4 | Adverse Direction | Automatic |
| Info                                                                                                                                                                                                                                                                                                                                                                                                                                                                                                                                                                       |                                                                                |  |       |                                         |              |                                     |            |                       |                     |                                                                                |                                                                                                                                                                                                                                                                                                                                                                                                                                                               |               |  |          |           |      |   |                  |   |                  |      |                   |        |                                                                                                                                                                                                                                                                                                                                                                                                                                                |            |  |                    |              |                      |   |                         |   |                   |           |
| Model                                                                                                                                                                                                                                                                                                                                                                                                                                                                                                                                                                      | frequentist<br>Polynomial degree 2 v1.1                                        |  |       |                                         |              |                                     |            |                       |                     |                                                                                |                                                                                                                                                                                                                                                                                                                                                                                                                                                               |               |  |          |           |      |   |                  |   |                  |      |                   |        |                                                                                                                                                                                                                                                                                                                                                                                                                                                |            |  |                    |              |                      |   |                         |   |                   |           |
| Dataset Name                                                                                                                                                                                                                                                                                                                                                                                                                                                                                                                                                               | Marx et al. - Liver weight - female                                            |  |       |                                         |              |                                     |            |                       |                     |                                                                                |                                                                                                                                                                                                                                                                                                                                                                                                                                                               |               |  |          |           |      |   |                  |   |                  |      |                   |        |                                                                                                                                                                                                                                                                                                                                                                                                                                                |            |  |                    |              |                      |   |                         |   |                   |           |
| User notes                                                                                                                                                                                                                                                                                                                                                                                                                                                                                                                                                                 | [Add user notes here]                                                          |  |       |                                         |              |                                     |            |                       |                     |                                                                                |                                                                                                                                                                                                                                                                                                                                                                                                                                                               |               |  |          |           |      |   |                  |   |                  |      |                   |        |                                                                                                                                                                                                                                                                                                                                                                                                                                                |            |  |                    |              |                      |   |                         |   |                   |           |
| Dose-Response Model                                                                                                                                                                                                                                                                                                                                                                                                                                                                                                                                                        | $M[\text{dose}] = g + b_1 \cdot \text{dose} + b_2 \cdot \text{dose}^2 + \dots$ |  |       |                                         |              |                                     |            |                       |                     |                                                                                |                                                                                                                                                                                                                                                                                                                                                                                                                                                               |               |  |          |           |      |   |                  |   |                  |      |                   |        |                                                                                                                                                                                                                                                                                                                                                                                                                                                |            |  |                    |              |                      |   |                         |   |                   |           |
| Model Options                                                                                                                                                                                                                                                                                                                                                                                                                                                                                                                                                              |                                                                                |  |       |                                         |              |                                     |            |                       |                     |                                                                                |                                                                                                                                                                                                                                                                                                                                                                                                                                                               |               |  |          |           |      |   |                  |   |                  |      |                   |        |                                                                                                                                                                                                                                                                                                                                                                                                                                                |            |  |                    |              |                      |   |                         |   |                   |           |
| BMR Type                                                                                                                                                                                                                                                                                                                                                                                                                                                                                                                                                                   | Std. Dev.                                                                      |  |       |                                         |              |                                     |            |                       |                     |                                                                                |                                                                                                                                                                                                                                                                                                                                                                                                                                                               |               |  |          |           |      |   |                  |   |                  |      |                   |        |                                                                                                                                                                                                                                                                                                                                                                                                                                                |            |  |                    |              |                      |   |                         |   |                   |           |
| BMRF                                                                                                                                                                                                                                                                                                                                                                                                                                                                                                                                                                       | 1                                                                              |  |       |                                         |              |                                     |            |                       |                     |                                                                                |                                                                                                                                                                                                                                                                                                                                                                                                                                                               |               |  |          |           |      |   |                  |   |                  |      |                   |        |                                                                                                                                                                                                                                                                                                                                                                                                                                                |            |  |                    |              |                      |   |                         |   |                   |           |
| Tail Probability                                                                                                                                                                                                                                                                                                                                                                                                                                                                                                                                                           | -                                                                              |  |       |                                         |              |                                     |            |                       |                     |                                                                                |                                                                                                                                                                                                                                                                                                                                                                                                                                                               |               |  |          |           |      |   |                  |   |                  |      |                   |        |                                                                                                                                                                                                                                                                                                                                                                                                                                                |            |  |                    |              |                      |   |                         |   |                   |           |
| Confidence Level                                                                                                                                                                                                                                                                                                                                                                                                                                                                                                                                                           | 0.95                                                                           |  |       |                                         |              |                                     |            |                       |                     |                                                                                |                                                                                                                                                                                                                                                                                                                                                                                                                                                               |               |  |          |           |      |   |                  |   |                  |      |                   |        |                                                                                                                                                                                                                                                                                                                                                                                                                                                |            |  |                    |              |                      |   |                         |   |                   |           |
| Distribution Type                                                                                                                                                                                                                                                                                                                                                                                                                                                                                                                                                          | Normal                                                                         |  |       |                                         |              |                                     |            |                       |                     |                                                                                |                                                                                                                                                                                                                                                                                                                                                                                                                                                               |               |  |          |           |      |   |                  |   |                  |      |                   |        |                                                                                                                                                                                                                                                                                                                                                                                                                                                |            |  |                    |              |                      |   |                         |   |                   |           |
| Model Data                                                                                                                                                                                                                                                                                                                                                                                                                                                                                                                                                                 |                                                                                |  |       |                                         |              |                                     |            |                       |                     |                                                                                |                                                                                                                                                                                                                                                                                                                                                                                                                                                               |               |  |          |           |      |   |                  |   |                  |      |                   |        |                                                                                                                                                                                                                                                                                                                                                                                                                                                |            |  |                    |              |                      |   |                         |   |                   |           |
| Dependent Variable                                                                                                                                                                                                                                                                                                                                                                                                                                                                                                                                                         | mg/kg bw/day                                                                   |  |       |                                         |              |                                     |            |                       |                     |                                                                                |                                                                                                                                                                                                                                                                                                                                                                                                                                                               |               |  |          |           |      |   |                  |   |                  |      |                   |        |                                                                                                                                                                                                                                                                                                                                                                                                                                                |            |  |                    |              |                      |   |                         |   |                   |           |
| Independent Variable                                                                                                                                                                                                                                                                                                                                                                                                                                                                                                                                                       | g                                                                              |  |       |                                         |              |                                     |            |                       |                     |                                                                                |                                                                                                                                                                                                                                                                                                                                                                                                                                                               |               |  |          |           |      |   |                  |   |                  |      |                   |        |                                                                                                                                                                                                                                                                                                                                                                                                                                                |            |  |                    |              |                      |   |                         |   |                   |           |
| Total # of Observations                                                                                                                                                                                                                                                                                                                                                                                                                                                                                                                                                    | 4                                                                              |  |       |                                         |              |                                     |            |                       |                     |                                                                                |                                                                                                                                                                                                                                                                                                                                                                                                                                                               |               |  |          |           |      |   |                  |   |                  |      |                   |        |                                                                                                                                                                                                                                                                                                                                                                                                                                                |            |  |                    |              |                      |   |                         |   |                   |           |
| Adverse Direction                                                                                                                                                                                                                                                                                                                                                                                                                                                                                                                                                          | Automatic                                                                      |  |       |                                         |              |                                     |            |                       |                     |                                                                                |                                                                                                                                                                                                                                                                                                                                                                                                                                                               |               |  |          |           |      |   |                  |   |                  |      |                   |        |                                                                                                                                                                                                                                                                                                                                                                                                                                                |            |  |                    |              |                      |   |                         |   |                   |           |

| Model Results                                                                                                                                                                                                                                                                                                                                                                                                                                                                       |             |                  |  |                 |             |          |             |      |             |       |             |                |             |        |   |
|-------------------------------------------------------------------------------------------------------------------------------------------------------------------------------------------------------------------------------------------------------------------------------------------------------------------------------------------------------------------------------------------------------------------------------------------------------------------------------------|-------------|------------------|--|-----------------|-------------|----------|-------------|------|-------------|-------|-------------|----------------|-------------|--------|---|
| <table border="1" style="width: 100%; border-collapse: collapse;"> <thead> <tr style="background-color: #a6c9ec;"> <th colspan="2">Benchmark Dose</th> </tr> </thead> <tbody> <tr> <td>BMD</td> <td>55.52267075</td> </tr> <tr> <td>BMDL</td> <td>35.13465513</td> </tr> <tr> <td>BMDU</td> <td>84.53002311</td> </tr> <tr> <td>AIC</td> <td>66.76816555</td> </tr> <tr> <td>Test 4 P-value</td> <td>0.654038802</td> </tr> <tr> <td>D.O.F.</td> <td>1</td> </tr> </tbody> </table> |             | Benchmark Dose   |  | BMD             | 55.52267075 | BMDL     | 35.13465513 | BMDU | 84.53002311 | AIC   | 66.76816555 | Test 4 P-value | 0.654038802 | D.O.F. | 1 |
| Benchmark Dose                                                                                                                                                                                                                                                                                                                                                                                                                                                                      |             |                  |  |                 |             |          |             |      |             |       |             |                |             |        |   |
| BMD                                                                                                                                                                                                                                                                                                                                                                                                                                                                                 | 55.52267075 |                  |  |                 |             |          |             |      |             |       |             |                |             |        |   |
| BMDL                                                                                                                                                                                                                                                                                                                                                                                                                                                                                | 35.13465513 |                  |  |                 |             |          |             |      |             |       |             |                |             |        |   |
| BMDU                                                                                                                                                                                                                                                                                                                                                                                                                                                                                | 84.53002311 |                  |  |                 |             |          |             |      |             |       |             |                |             |        |   |
| AIC                                                                                                                                                                                                                                                                                                                                                                                                                                                                                 | 66.76816555 |                  |  |                 |             |          |             |      |             |       |             |                |             |        |   |
| Test 4 P-value                                                                                                                                                                                                                                                                                                                                                                                                                                                                      | 0.654038802 |                  |  |                 |             |          |             |      |             |       |             |                |             |        |   |
| D.O.F.                                                                                                                                                                                                                                                                                                                                                                                                                                                                              | 1           |                  |  |                 |             |          |             |      |             |       |             |                |             |        |   |
| <table border="1" style="width: 100%; border-collapse: collapse;"> <thead> <tr style="background-color: #a6c9ec;"> <th colspan="2">Model Parameters</th> </tr> </thead> <tbody> <tr> <td># of Parameters</td> <td>4</td> </tr> <tr style="background-color: #cccccc;"> <td>Variable</td> <td>Estimate</td> </tr> <tr> <td>g</td> <td>6.454825157</td> </tr> <tr> <td>beta1</td> <td>0.006323865</td> </tr> <tr> <td>beta2</td> <td>4.97303E-05</td> </tr> </tbody> </table>         |             | Model Parameters |  | # of Parameters | 4           | Variable | Estimate    | g    | 6.454825157 | beta1 | 0.006323865 | beta2          | 4.97303E-05 |        |   |
| Model Parameters                                                                                                                                                                                                                                                                                                                                                                                                                                                                    |             |                  |  |                 |             |          |             |      |             |       |             |                |             |        |   |
| # of Parameters                                                                                                                                                                                                                                                                                                                                                                                                                                                                     | 4           |                  |  |                 |             |          |             |      |             |       |             |                |             |        |   |
| Variable                                                                                                                                                                                                                                                                                                                                                                                                                                                                            | Estimate    |                  |  |                 |             |          |             |      |             |       |             |                |             |        |   |
| g                                                                                                                                                                                                                                                                                                                                                                                                                                                                                   | 6.454825157 |                  |  |                 |             |          |             |      |             |       |             |                |             |        |   |
| beta1                                                                                                                                                                                                                                                                                                                                                                                                                                                                               | 0.006323865 |                  |  |                 |             |          |             |      |             |       |             |                |             |        |   |
| beta2                                                                                                                                                                                                                                                                                                                                                                                                                                                                               | 4.97303E-05 |                  |  |                 |             |          |             |      |             |       |             |                |             |        |   |

| Goodness of Fit |      |                  |               |               |              |           |             |                 |
|-----------------|------|------------------|---------------|---------------|--------------|-----------|-------------|-----------------|
| Dose            | Size | Estimated Median | Calc'd Median | Observed Mean | Estimated SD | Calc'd SD | Observed SD | Scaled Residual |
| 0               | 10   | 6.454825157      | 6.42          | 6.42          | 0.50442482   | 0.4       | 0.4         | -0.218321561    |
| 25              | 10   | 6.644003235      | 6.7           | 6.7           | 0.50442482   | 0.56      | 0.56        | 0.351047985     |
| 90              | 10   | 7.426788568      | 7.4           | 7.4           | 0.50442482   | 0.6       | 0.6         | -0.167939572    |
| 180             | 10   | 9.20438304       | 9.21          | 9.21          | 0.50442482   | 0.54      | 0.54        | 0.035213153     |

| Likelihoods of Interest |                 |                 |            |
|-------------------------|-----------------|-----------------|------------|
| Model                   | Log Likelihood* | # of Parameters | AIC        |
| A1                      | -29.28365975    | 5               | 68.5673195 |
| A2                      | -28.41912111    | 8               | 72.8382422 |
| A3                      | -29.28365975    | 5               | 68.5673195 |
| fitted                  | -29.38408277    | 4               | 66.7681655 |
| R                       | -63.96325219    | 2               | 131.926504 |

| Tests of Interest |                          |         |            |
|-------------------|--------------------------|---------|------------|
| Test              | -2*Log(Likelihood Ratio) | Test df | p-value    |
| 1                 | 71.08826215              | 6       | <0.0001    |
| 2                 | 1.729077269              | 3       | 0.63048872 |
| 3                 | 1.729077269              | 3       | 0.63048872 |
| 4                 | 0.200846052              | 1       | 0.6540388  |

Frequentist Polynomial Degree 2 Model with BMR of 1 Std.  
Dev. for the BMD and 0.95 Lower Confidence Limit for the  
BMDL

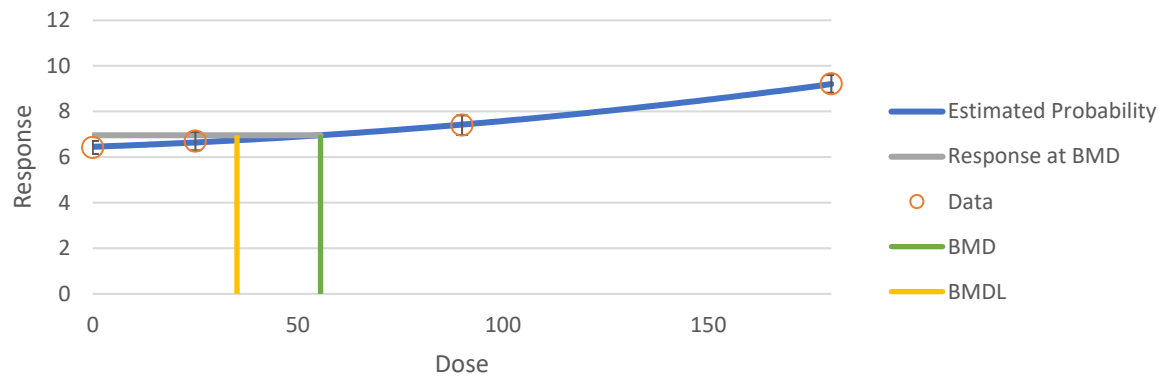

## Summary of Results

| Option set #1 (Hover for details)                  |               |             |           |          |          |           |                |             |                                        |                      |                           |
|----------------------------------------------------|---------------|-------------|-----------|----------|----------|-----------|----------------|-------------|----------------------------------------|----------------------|---------------------------|
| Model                                              | Analysis Type | Restriction | RiskType  | BMD      | BMDL     | BMDU      | Test 4 P-Value | AIC         | Unnormalized Log Posterior Probability | BMDS Recommendation  | BMDS Recommendation Notes |
| <a href="#">Polynomial Degree 3 (CV - normal)*</a> | frequentist   | Restricted  | Std. Dev. | 51.53386 | 34.11537 | 84.631691 | 0.9771195      | 64.61361206 | -                                      | Viable - Recommended | Lowest AIC                |
| <a href="#">Polynomial Degree 2 (CV - normal)</a>  | frequentist   | Restricted  | Std. Dev. | 55.52267 | 35.13466 | 84.530023 | 0.6540388      | 66.76816555 | -                                      | Viable - Alternate   |                           |

\*Constant variance case presented (BMDS Test 2 p-value = 0.630488719567165), with the selected model in bold; scaled residuals for selected model for doses 0, 25, 90, 180 were -0.115841708701134, 0.170330999055086, -0.061819828632339, 6.21438086272044E-03 [units], respectively.

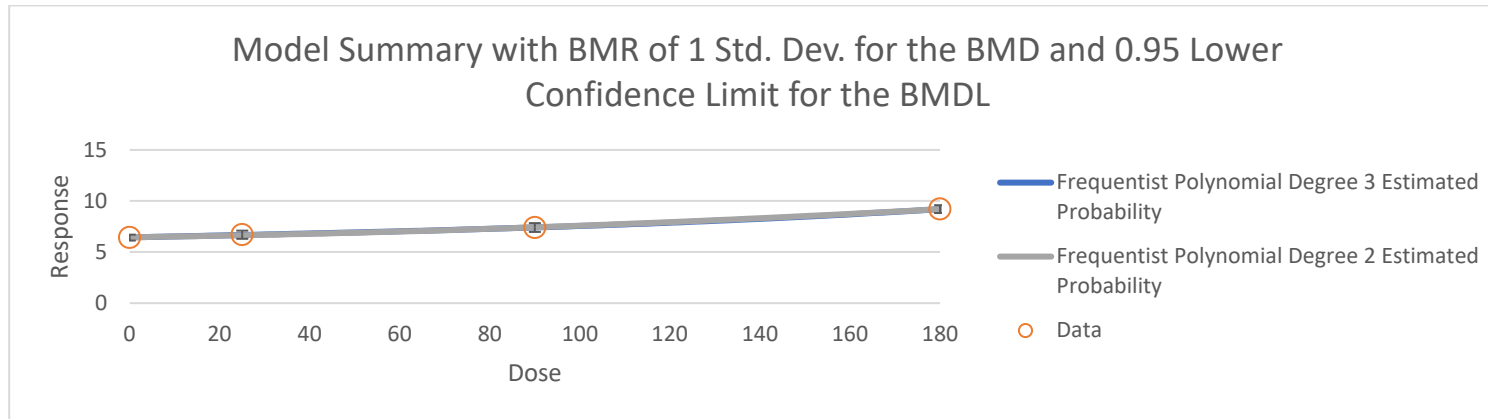

Supplement: Supplementary file 4 [file supplementary]
